# Supplementary material for: Energy Taxis toward Host-Derived Nitrate Supports a Salmonella Pathogenicity Island 1-Independent Mechanism of Invasion
Source: PubMed Central journal article supplement (PMC4958259; doi:10.1128/mbio.00960-16), 2016-07-19

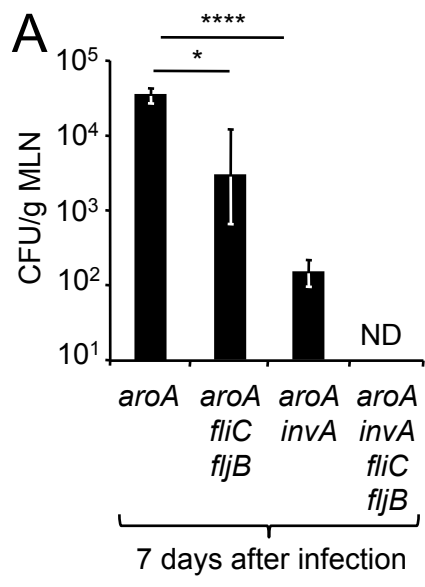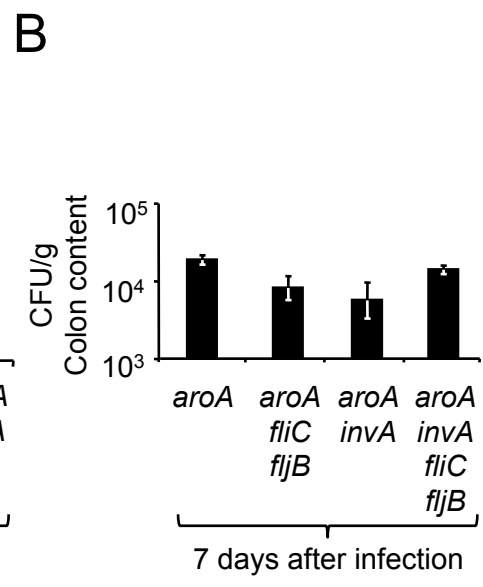

Supplement: mbo004162907sf1.pdf [file mbo004162907sf1.pdf]
